# Supplementary material for: Detection and quantification of SARS-CoV-2 by droplet digital PCR in real-time PCR negative nasopharyngeal swabs from suspected COVID-19 patients
Source: PubMed Central journal article supplement (PMC7478621; doi:10.1371/journal.pone.0236311), 2020-09-08

Supplementary Figure 1

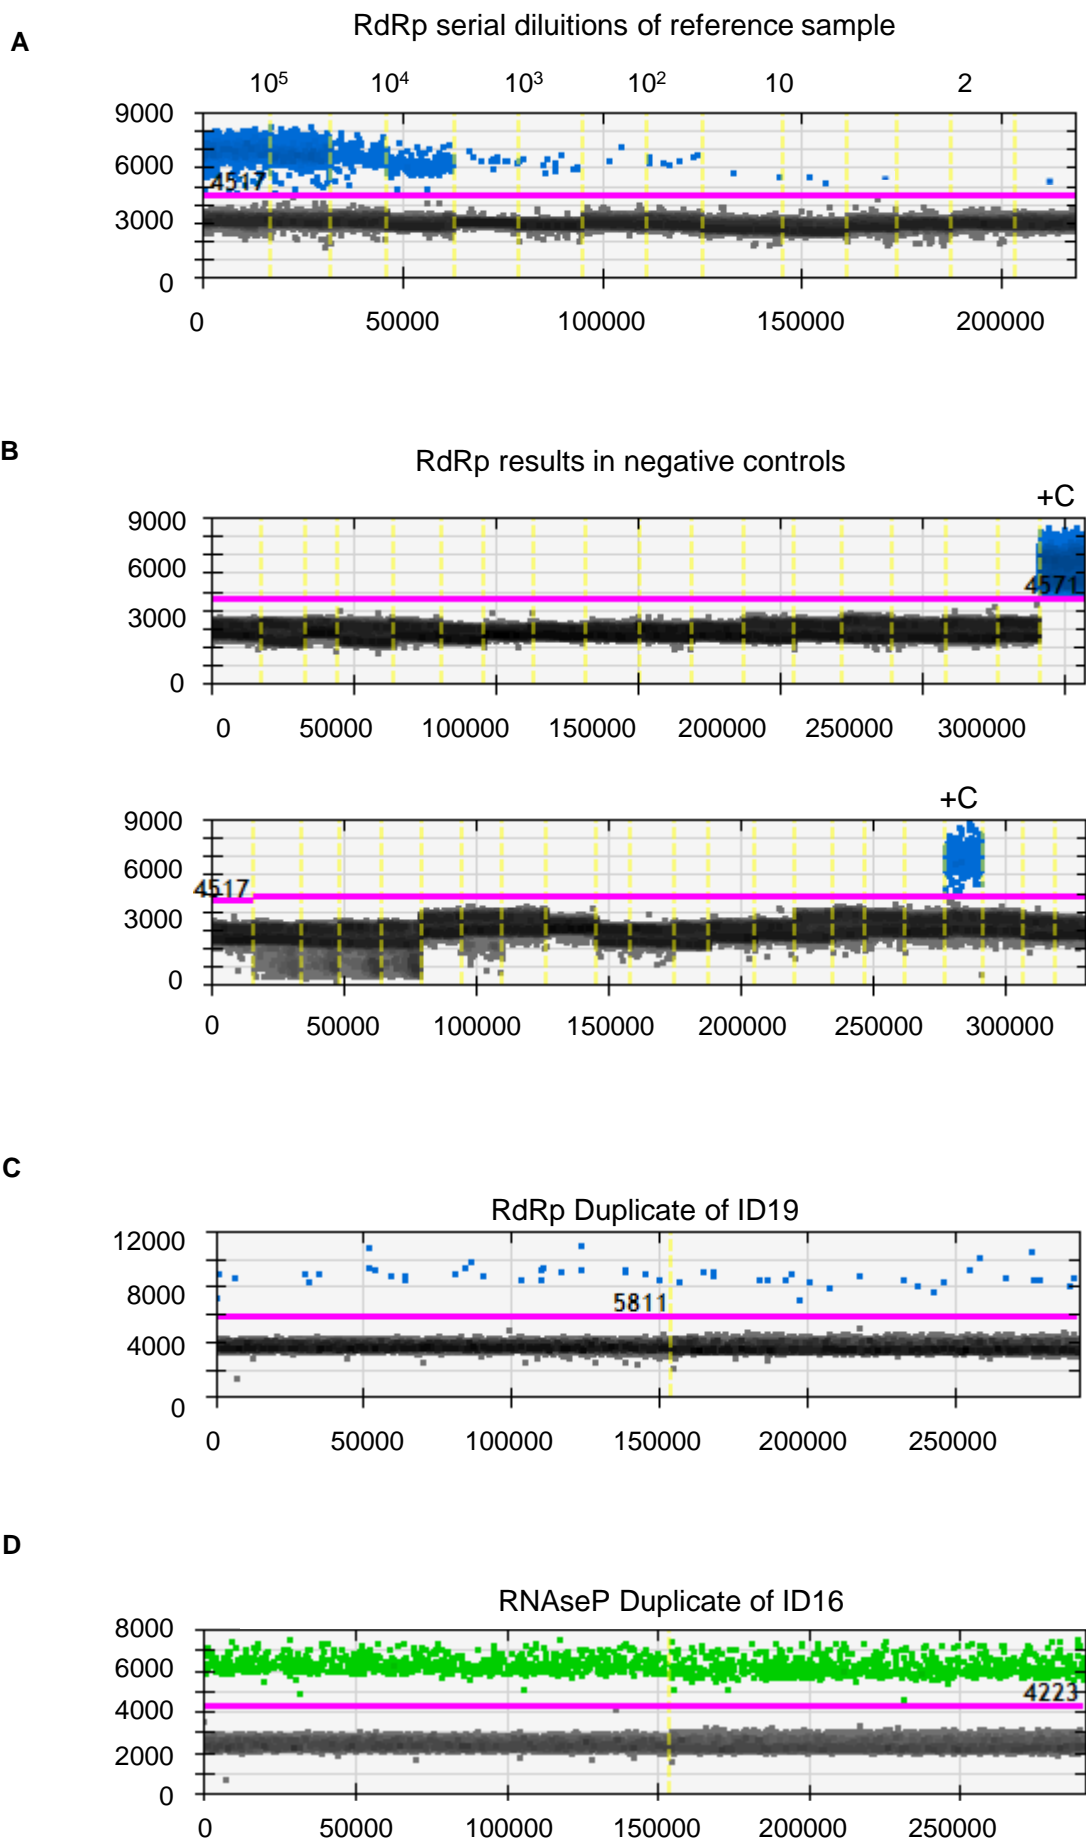

Supplement: pone.0236311.s001.pdf [file pone.0236311.s001.pdf]
